# Supplementary material for: Frequent amplification of AIB1, a critical oncogene modulating major signaling pathways, is associated with poor survival in gastric cancer
Source: PubMed Central journal article supplement (PMC4546471; doi:10.18632/oncotarget.3852), 2015-04-29
Supplement: oncotarget-06-14344-s001.pdf [file oncotarget-06-14344-s001.pdf]

**SUPPLEMENTARY TABLES****Supplementary Table S1. The sequences of siRNAs used in this study**

| si-RNAs                  | Sequences (5'-3')     |
|--------------------------|-----------------------|
| si-AIB1-709 (sense)      | GGACCUGGUUACACAAGUTT  |
| si-AIB1-709 (antisense)  | ACUUGUGUUAACCAGGUCCTT |
| si-AIB1-2252 (sense)     | GGAGGAGUAUCCUCUACAUTT |
| si-AIB1-2252 (antisense) | AUGUAGAGGAUACUCCUCCTT |
| si-NC (sense)            | UUCUCCGAACGUGUCACGUTT |
| si-NC (antisense)        | ACGUGACACGUUCGGAGAATT |

**Supplementary Table S2. qRT-PCR primers used in this study**

| Gene bank (ID) | Genes                             | Forward primer (5'-3') | Reverse primer (5'-3') | Product length (bp) |
|----------------|-----------------------------------|------------------------|------------------------|---------------------|
| NM_001174087.1 | <i>AIB1</i>                       | CCGATTTAAAGCTGAGCTGC   | CCAGTCAAAGGATGTTCAAGC  | 111                 |
| NM_001098209.1 | <i><math>\beta</math>-catenin</i> | TCGAGGACGGTCCGACT      | ATTGTCCACGCTGGATTTTC   | 97                  |
| NM_053056.2    | <i>CCND1</i>                      | GACCTTCGTTGCCCTCTGT    | TGAGGCGGTAGTAGGACAGG   | 140                 |
| NM_000610.3    | <i>CD44</i>                       | GACAAGTTTTGGTGGCAGC    | CACGTGGAATACACCTGCAA   | 105                 |
| NM_002467.4    | <i>CMYC</i>                       | GCTGCTTAGACGCTGGATT    | CACCGAGTCGTAGTCGAGGT   | 114                 |
| NM_005228.3    | <i>ErbB1</i>                      | GGGCTCTGGAGGAAAAGAAA   | AAATTCCCAAGGACCACCTC   | 127                 |
| NM_001005862.2 | <i>ErbB2</i>                      | ATCAACTGCACCCACTCCTG   | TGATGAGGATCCCAAAGACCAC | 145                 |
| NM_001005915.1 | <i>ErbB3</i>                      | AGTCATGAGGGCGAACGAC    | TCACACTCAGGCCATTCAGA   | 119                 |
| NM_001042599.1 | <i>ErbB4</i>                      | ACGGGATCTGAGACTTCCAA   | TTATTCTCCGTTCTGCACA    | 127                 |
| NM_004530.4    | <i>MMP2</i>                       | TTGCTGGAGACAAATTCTGG   | AAGAAGTAGCTGTGACCGCC   | 148                 |
| NM_002423.3    | <i>MMP7</i>                       | GAGCTACAGTGGGAACAGGC   | GCATCTCCTTGAGTTTGCT    | 103                 |
| NM_004994.2    | <i>MMP9</i>                       | GCACTGCAGGATGTCATAGG   | ACGACGTCTTCCAGTACCGA   | 128                 |
| NM_004995.3    | <i>MMP14</i>                      | AGCCATATTGCTGTAGCCAG   | GTTGTCTCCTGCTCCCCCT    | 105                 |
| NM_003380.3    | <i>Vimentin</i>                   | CTGGATTTCTCTTCGTGGA    | CGAAAACACCCTGCAATCTT   | 133                 |
| R_003286.2     | <i>18S</i>                        | CGCCGCTAGAGGTGAAATTC   | CTTTCGCTCTGGTCCGTCTT   | 52                  |
